# Supplementary material for: Genetic timestamping of plasma cells in vivo reveals tissue-specific homeostatic population turnover
Source: eLife. 2020 Nov 2;9:e59850. doi: 10.7554/eLife.59850 (PMC7682985; doi:10.7554/eLife.59850)
Supplement: Figure 1—source data 1. [file elife-59850-fig1-data1.xlsx]

## Sheet: JCHAIN
B_PC_Sp	B_PB_Sp	B_PC_BM	B_GC_CB_Sp	B_GC_CC_Sp	NKT_Sp_LPS_3d	IAP_SLN	proB_FrA_BM	MC_SCA1hi_CX3CR1lo_PC	proB_FrBC_BM	proB_CLP_BM	B_mem_Sp	B1b_PC
969565	323595	294978	7302.92	5041.5	1692.82	1672.39	773.805	232.677	177.26	102.945	74.0621	59.9233

## Sheet: PRDM1
B_PC_Sp	Treg_4_FP3+_Nrplo_Co	NKT_Sp_LPS_3hr	B_PB_Sp	NK_27-11b+_BM	NK_27-11b+_Sp	T8_IEL_LCMV_d7_Gut	BEC_SLN	NKT_Sp_LPS_18hr	NK_27+11b+_Sp	B_PC_BM	NK_27+11b+_BM	T8_TE_LCMV_d7_Sp
2086.94	1397.88	1104.62	1045.74	574.673	549.112	442.723	394.651	394.607	360.017	343.244	337.188	302.339

## Sheet: IRF4
B_PC_Sp	B_PB_Sp	B_PC_BM	T_4_Sp_aCD3+CD40_18hr	Treg_4_FP3+_Nrplo_Co	B_FrE_BM	B_mem_Sp	B_MZ_Sp	proB_FrBC_BM	B_T2_Sp	T8_IEL_LCMV_d7_Gut	MF_226+II+480lo_PC	B_Sp
6169.03	3421.28	1636.05	1500.8	1372.46	1150.75	1008.58	942.825	918.495	847.643	838.775	812.271	805.371

## Sheet: XBP1
B_PC_Sp	B_PB_Sp	B_PC_BM	MF_pIC_Alv_Lu	MF_Alv_Lu	MF_226+II+480lo_PC	GN_Thio_PC	DC_pDC_Sp	BEC_SLN	MF_102+480+_PC	Mo_6C+II-_Bl	Mo_6C-II-_Bl	GN_Sp
38090.9	30949.1	7880.37	4979.28	4368.88	4118.08	3939.31	3482.23	3259.55	3210.86	2843.27	2806.47	2342.13

## Sheet: SDC1
B_PC_Sp	B_PB_Sp	MF_226+II+480lo_PC	B_PC_BM	proB_FrA_BM	Tgd_g2+d17_LN	ILC3_CCR6+_SI	Ep_MEChi_Th	ILC3_NKp46-CCR6-_SI	proB_CLP_BM	LEC_SLN	ILC3_NKp46+_SI	MMP4_135+_BM
5807.05	3653.15	1777.66	1295.92	936.755	800.927	700.476	680.817	618.959	561.833	517.253	501.305	248.049
