# Supplementary material for: Genetic timestamping of plasma cells in vivo reveals tissue-specific homeostatic population turnover
Source: eLife. 2020 Nov 2;9:e59850. doi: 10.7554/eLife.59850 (PMC7682985; doi:10.7554/eLife.59850)
Supplement: Figure 2—figure supplement 1—source data 1. [file elife-59850-fig2-figsupp1-data1.xlsx]

## Sheet: % live cells
	B6			JchaincreERT2
GlowBhi	0.16	0.09	0.0074	1.59	1.4	1.4	1.3	0.7	0.92	0.61	0.98	0.88	0.54	1.63	1.33	1.22	0.73	0.95	0.39	0.87	0.84	0.056	0.048	0.043	0.08	0.069	0.042	0.059	0.08

## Sheet: % GC B cells
	B6			JchaincreERT2
GlowBhi	6.25	0.83	29.1	93.6	79.1	88.2	30.6	88.1	81.1	91.5	87.9	94.6	93	86.4	78.9	80.8	85.9	66.2	67	55.3	77.6	49.7	45.6	39.8	55.2	36.7	70	67.6	67.9

## Sheet: % CD138+
	B6			JchaincreERT2
GlowBhi	0	3.56	5.61	0.99	2.48	1.86	4.56	1.49	3.25	1.37	3.46	2.16	0.94	1.16	1.66	0.89	2.13	5.2	2.27	3.83	1.6	8.21	13.4	9.6	20.1	22.2	4.69	3.65	10

## Sheet: % CD138+CXC4+
	B6			JchaincreERT2
GlowBhi	0	1.22	0.12	0.12	0.24	0.25	1.08	0.2	0.93	0.64	1.24	1.1	0.31	0.23	0.59	0.11	0.99	2.06	0.86	1.39	0.32	2.67	3.5	6.25	7.21	9.23	0.29	1.39	4.55
