# Supplementary material for: Genetic timestamping of plasma cells in vivo reveals tissue-specific homeostatic population turnover
Source: eLife. 2020 Nov 2;9:e59850. doi: 10.7554/eLife.59850 (PMC7682985; doi:10.7554/eLife.59850)
Supplement: Figure 2—figure supplement 2—source data 1. [file elife-59850-fig2-figsupp2-data1.xlsx]

## Sheet: Spleen B lineage #1 (%)
	CD138+CXCR4+ PCs					Fo					T1					T2					MZ					B1a					B1b
GFP+	70.3	69.3	71	80.7	91	0.000864	0.00145	0.00144	0.005	0.00131	0.34	0.62	0.49	0.46	0.37	0.056	0.021	0.028	0.017	0.11	0.044	0.053	0.067	0.082	0.043	0.2	0.36	0.13	0.31	0	3.16	4.82	6.93	5.24	0.34

## Sheet: Spleen B lineage #2 (%)
	CD138+CXCR4+ (PC)												CD138+CXCR4-												Fo B												GC B												B220+CD19- (myeloid)
GFP+	80.3	81.6	81.3	91.3	89.3	92.4	88.6	78.5	74.8	77	86.4	85.8	1.31	2.38	1.96	1.76	1.49	2.49	2.05	0.79	1	1.45	2.71	0.92	0.028	0.03	0.026	0.00148	0.00109	0.00108	0.00222	0.000323	0.00115	0.000309	0.00194	0	0.36	0.45	0.37	0.022	0.058	0.066	0.04	0.022	0.025	0.041	0.014	0.017	0.28
[truncated: 45 more columns]

## Sheet: Bone marrow B lineage (%)
	CD138+B220lo PCs					immature B					Pre-B					Pro-B fraction A					Pro-B fraction B					Pro-B fraction C					Pro-B fraction C'
GFP+	81.4	73.5	73.5	86	60.9	0.068	0.066	0.052	0.033	0.00921	0.1	0.035	0.064	0.098	0.023	0.049	0	0.032	0.055	0.018	0.021	0	0	0	0.00853	0	0	0.023	0.034	0	0	0	0	0.021	0
