# Supplementary material for: Genetic timestamping of plasma cells in vivo reveals tissue-specific homeostatic population turnover
Source: eLife. 2020 Nov 2;9:e59850. doi: 10.7554/eLife.59850 (PMC7682985; doi:10.7554/eLife.59850)
Supplement: Figure 2—source data 1. [file elife-59850-fig2-data1.xlsx]

## Sheet: %CD138+
eGFPnegB220neg	eGFPlowB220hi	eGFPintB220int	eGFPhiB220low
0.14	0.99	87.4	92.4
0.15	2.48	89.4	94.5
0.19	1.86	89.6	95.1
0.11	4.56	85.8	92.1
0.17	1.49	81.4	93.7
0.14	3.25	86.3	92.7
0.17	1.41	78.3	94.7
0.21	3.47	86.7	95.6
0.18	2.17	87.7	93.9
0.15	0.94	73.3	93.3
0.14	1.16	92.4	95.3
0.15	1.66	88.5	94.8
0.16	0.89	85.8	95.6
0.12	2.13	91	94.8
0.12	5.2	87.4	94.9
0.083	2.27	94.1	95.8
0.088	3.83	87.1	95.4
0.09	1.6	94.4	94.2
0.13	8.21	46.6	82.6
0.1	13.4	54.8	84.5
0.13	9.6	53.7	79.6
0.074	20.1	59	79.3
0.096	22.2	60.3	84.3
0.037	4.69	31.6	76.8
0.042	3.65	43.7	79.9
0.12	10	56.4	78.4

## Sheet: %CD138+CXCR4+
eGFPnegB220neg	eGFPlowB220hi	eGFPintB220int	eGFPhiB220low
0.00276	0.12	29.5	62.9
0.00436	0.24	42.3	62.2
0.00321	0.25	33.5	61.8
0.013	1.08	53.1	65.3
0.013	0.2	37.9	66.9
0.00836	0.93	40.7	62
0.017	0.67	40.2	72.8
0.027	1.26	40.7	77.1
0.019	1.11	46.5	74.7
0.012	0.3	29.7	65.2
0.00676	0.23	65.3	70.6
0.01	0.59	51.9	75.4
0.00777	0.11	43.8	63
0.0062	0.99	58.6	66.6
0.012	2.06	64.1	75.7
0.00749	0.86	67.1	76.5
0.011	1.39	58.1	77.5
0.00506	0.32	60.4	70.1
0.054	2.67	33	71.2
0.03	3.5	41.8	75.8
0.087	6.25	45.2	73.6
0.03	7.21	47.6	72.4
0.044	9.23	46	78.2
0.00904	0.29	12.3	62.1
0.014	1.39	33	68.6
0.07	4.55	44.2	71.4

## Sheet: % B cells and GC B cells
B-cells	GC
99.8	93.6
98.7	79.1
99.4	88.2
98	30.6
99.1	88.1
99.1	81.1
99.5	91.5
99.3	87.9
99.6	94.6
99.8	93
98.4	86.4
97.3	78.9
98	80.8
97.9	85.9
94.4	66.2
95.1	67
96	55.3
97.5	77.6
97.3	49.7
98.6	45.6
99	39.8
96.5	55.2
97	36.7
99.1	70
99.3	67.6
98.7	67.9
