# Supplementary material for: Genetic timestamping of plasma cells in vivo reveals tissue-specific homeostatic population turnover
Source: eLife. 2020 Nov 2;9:e59850. doi: 10.7554/eLife.59850 (PMC7682985; doi:10.7554/eLife.59850)
Supplement: Figure 3—figure supplement 1—source data 1. [file elife-59850-fig3-figsupp1-data1.xlsx]

## Sheet: % BLIMP1+IRF4+
	B6			JchaincreERT2
GlowBhi	6.08	9.29	4.74	6.41	4.72	11.8	4.14	13.1	2.09	1.75	2.36	1.34	2.68	8.17	3.72	5.8	1.86	1.33	3.12	1.27	2.59	30.6	27.3	12.8	40.3	45.3	19	13.2	21.2
