# Supplementary material for: Genetic timestamping of plasma cells in vivo reveals tissue-specific homeostatic population turnover
Source: eLife. 2020 Nov 2;9:e59850. doi: 10.7554/eLife.59850 (PMC7682985; doi:10.7554/eLife.59850)
Supplement: Figure 3—source data 1. [file elife-59850-fig3-data1.xlsx]

## Sheet: %BLIMP1+IRF4+
GnegBneg	GlowBhi	GintBint	GhiBlow
0.15	4.41	71.6	73.5
0.12	9.46	81.9	89
0.12	7.49	83	87.4
0.14	16.6	85.7	93.9
0.12	6.51	81.1	86.4
0.094	15.7	89.3	88.4
0.045	2.1	29.8	69.3
0.075	3.24	48.5	74.7
0.092	1.91	58.8	73.9
0.061	3.3	62	75.2
0.074	12.3	88.2	94.7
0.076	7.31	87	95.6
0.055	9.35	80	92.5
0.03	2.83	72.3	89.3
0.073	3.49	86.5	86.6
0.14	6.85	82.1	89.6
0.16	4.59	69.1	85.4
0.079	5.93	77.2	80.9
0.083	33.1	90.2	90.5
0.038	30.3	88.6	86.6
0.18	15.3	94.1	92.1
0.24	43.4	91.6	90.9
0.2	54	91.6	90.8
0.02	22.3	69	65.7
0.032	16.6	74.9	67.8
0.11	26.8	83.7	78.5
