# Supplementary material for: Genetic timestamping of plasma cells in vivo reveals tissue-specific homeostatic population turnover
Source: eLife. 2020 Nov 2;9:e59850. doi: 10.7554/eLife.59850 (PMC7682985; doi:10.7554/eLife.59850)
Supplement: Figure 4—figure supplement 1—source data 1. [file elife-59850-fig4-figsupp1-data1.xlsx]

## Sheet: 0nM CD138+
	GFP+RFP+ plasma cells		GFP+RFPneg plasma cells		GFPnegRFPneg plasma cells
48h	0.055	0.014	11.65	6.75	88.296	93.237
72h	0.42	0.335	48.9	40.55	50.68	59.115
96h	1.125	1.355	56.45	45.7	42.425	52.495

## Sheet: 10nM CD138+
	GFP+RFP+ plasma cells		GFP+RFPneg plasma cells		GFPnegRFPneg plasma cells
48h	0.255	0.175	12.5	8.07	87.245	91.755
72h	3	2.155	46.16	40.8	50.85	57.045
96h	9.52	6.665	47.6	43.15	42.88	50.185

## Sheet: 250nM CD138+
	GFP+RFP+ plasma cells		GFP+RFPneg plasma cells		GFPnegRFPneg plasma cells
48h	1.145	0.265	15.25	7.545	83.605	92.19
72h	16.5	11.8	39.1	35.3	44.4	52.9
96h	34.05	28.7	29.3	25.55	36.65	45.75

## Sheet: 1uM CD138+
	GFP+RFP+ plasma cells		GFP+RFPneg plasma cells		GFPnegRFPneg plasma cells
48h	1.37	0.995	20.9	16.2	77.73	82.805
72h	21.15	21.35	41.8	39.25	37.05	39.4
96h	35.65	33.4	27.9	25.95	36.45	40.65

## Sheet: 0nM B cells
	GFP+RFP+ B cells		GFP+RFPneg B cells		GFPnegRFPneg B cells
48h	0.007	0.013	0.59	0.375	99.403	99.612
72h	0.16	0.135	2.01	1.86	97.83	98.005
96h	0.38	0.3	1.91	2.305	97.71	97.395

## Sheet: 10nM B cells
	GFP+RFP+ B cells		GFP+RFPneg B cells		GFPnegRFPneg B cells
48h	0.014	0.016	0.54	0.435	99.446	99.55
72h	0.155	0.195	1.78	1.89	98.065	97.915
96h	0.405	0.35	1.82	2.025	97.775	97.625

## Sheet: 250nM B cells
	GFP+RFP+ B cells		GFP+RFPneg B cells		GFPnegRFPneg B cells
48h	0.055	0.01	0.765	0.49	99.18	99.5
72h	0.46	0.34	2.395	2.14	97.145	97.52
96h	1.075	0.85	2.455	2.06	96.47	97.09

## Sheet: 1uM B cells
	GFP+RFP+ B cells		GFP+RFPneg B cells		GFPnegRFPneg B cells
48h	0.205	0.073	1.915	2.035	97.88	97.892
72h	1.075	1.095	4.37	4.385	94.555	94.52
96h	1.32	1.085	2.555	2.775	96.125	96.14
