# Supplementary material for: Genetic timestamping of plasma cells in vivo reveals tissue-specific homeostatic population turnover
Source: eLife. 2020 Nov 2;9:e59850. doi: 10.7554/eLife.59850 (PMC7682985; doi:10.7554/eLife.59850)
Supplement: Figure 4—figure supplement 2—source data 1. [file elife-59850-fig4-figsupp2-data1.xlsx]

## Sheet: Spleen B lineage #1 (%)
	CD138+CXCR4+ PCs					Fo					T1					T2					MZ					B1a					B1b
GFP+RFP+	0	0.033	0.062	0.048	0.18	0	0	0	0	0	0	0	0	0	0	0	0	0	0	0	0	0	0	0	0	0	0	0	0	0	0	0	0	0	0

## Sheet: Spleen B lineage #2 (%)
	CD138+CXCR4+ (PC)												CD138+CXCR4-												Fo B												GC B												B220+CD19- (myeloid)
GFP+RFP+	0.091	0.064	0.053	0	0.045	0	0.05	0	0.033	0.052	0.05	0.047	0	0	0	0	0	0	0	0	0	0	0	0	0	0	0	0	0	0	0	0	0	0	0	0	0	0	0	0	0	0	0	0	0	0	0	0	0
[truncated: 45 more columns]

## Sheet: Bone marrow B lineage (%)
	CD138+B220lo PCs					immature B					Pre-B					Pro-B fraction A					Pro-B fraction B					Pro-B fraction C					Pro-B fraction C'
GFP+RFP+	0.12	0.31	0.1	0.16	0.19	0	0	0	0	0	0	0	0	0	0.00293	0.024	0	0.016	0	0.036	0	0	0	0	0	0.05	0	0.023	0.034	0	0	0	0	0	0
