# Supplementary material for: Genetic timestamping of plasma cells in vivo reveals tissue-specific homeostatic population turnover
Source: eLife. 2020 Nov 2;9:e59850. doi: 10.7554/eLife.59850 (PMC7682985; doi:10.7554/eLife.59850)
Supplement: Figure 4—source data 1. [file elife-59850-fig4-data1.xlsx]

## Sheet: Spleen %GFP+RFP+
eGFPnegB220neg	eGFPlowB220hi	eGFPintB220int	eGFPhiB220low
0.000969	1.22	38.7	75
0.00123	1.75	36.6	74.5
0.0011	0.93	25.7	74.7
0.00222	1.27	35.2	73.4
0.00167	1.9	44.5	73.4
0.000389	1.33	44.2	76.8
0	2.03	47.3	74.4
0	3.15	41.3	78.3
0.000389	1.89	41.7	74
0	4.01	18.4	78.6
0	7.61	29.9	81.8
0	6.92	35.7	83.7
0	10.4	31.5	80.3
0	13.8	37.6	83.7

## Sheet: Spleen #GFP+RFP+
eGFPnegB220neg	eGFPlowB220hi	eGFPintB220int	eGFPhiB220low
4	80	55	533
5	151	60	770
4	30	29	358
9	104	51	851
8	143	165	1172
1	51	102	1168
0	101	105	868
0	102	64	1114
1	102	60	582
0	21	64	3243
0	37	88	3947
0	31	172	5877
0	71	199	4108
0	84	218	7413

## Sheet: Bone marrow %GFP+RFP+
eGFPnegB220neg	eGFPlowB220hi	eGFPintB220int	eGFPhiB220low
0.000127	0.47	28.6	89.8
0	0.29	40	90.4
0.0014	1.79	31.7	90.5
0	0.53	26.5	88.7
0.000737	12.6	50.5	87.6
0	2.44	41.6	81.4
0	0.21	26.5	80.8
0	0.72	47.8	81.4
0	0.12	43.5	88.8
0	0	17.6	89.3
0	2.17	23.1	87
0	3.77	22.9	88.7
0	10	23.7	85.9
0	26.1	36.5	85.5

## Sheet: Bone marrow #GFP+RFP+
eGFPnegB220neg	eGFPlowB220hi	eGFPintB220int	eGFPhiB220low
1	3	22	1069
0	2	14	820
9	14	19	1207
0	3	13	763
6	123	159	3075
0	30	52	885
0	2	9	332
0	9	22	777
0	1	10	454
0	0	9	1984
0	1	24	2206
0	2	16	4225
0	6	36	3143
0	12	50	5379
