# Supplementary material for: Genetic timestamping of plasma cells in vivo reveals tissue-specific homeostatic population turnover
Source: eLife. 2020 Nov 2;9:e59850. doi: 10.7554/eLife.59850 (PMC7682985; doi:10.7554/eLife.59850)
Supplement: Figure 5—source data 1. [file elife-59850-fig5-data1.xlsx]

## Sheet: 15 weeks
Spleen
	total PCs						eGFP+ PCs						GFP+RFP+ PCs
IgA	15.7	24.7	19.9	14.4	12.3	11.8	17.9	29.9	24.4	23.9	14.8	17.5	41.8	33.4	35.6	22.2	26.2
IgM	42.7	21.9	28.7	16.4	25.1	24.4	45.2	21.8	28.2	15.7	25.9	25.2	27.5	35.4	19.5	37.3	34.2
IgG1	27.1	29.6	32.7	55.3	47.8	43.1	28.5	29.8	34.4	50.4	48.8	42.3	16.8	20.3	36.8	33.8	30
Bone marrow
	total PCs						eGFP+ PCs						eGFP+RFP+ PCs
IgA	51.2	56.2	53.6	54.4	38.7	15.4	77.5	75.3	77.6	84.1	66	29.7	74.8	78	83.7	65.8	26.1
IgM	13	14.6	11.8	17	23.9	76.6	14.7	10.8	13.4	7.95	25.5	74.5	9.81	13.2	7.75	26.5	75.9
IgG1	3.85	7.05	5.72	9.83	8.72	1.5	3.42	5.54	4.47	3.53	5.45	0.68	5.84	3.49	3.88	2.99	1
mLN
	total PCs						eGFP+ PCs						eGFP+RFP+ PCs
IgA	24.8	43.4	33.2	51.7	37.1	43.7	24.9	45.3	37.1	53.8	38.4	47.2	41.8	35.8	57.8	35.7	57
IgM	14.9	13	24.5	9.14	23.4	13.1	16.9	13.1	25.6	9.44	23.8	13	20.5	37.3	17.9	31.8	16.8
IgG1	10.1	22.1	17.3	14.8	11.7	17.3	10.5	23.7	17.9	14.8	12.2	18.1	17.1	13.7	8.31	7.79	12.3
Peyer's patch
	total PCs						eGFP+ PCs						eGFP+RFP+ PCs
IgA	54.4	57	53.7	55.7	25.7	52.8	63.2	68.8	68.3	67.3	37.1	67.7	71.5	74.9	67	39.4	67.3
IgM	13.8	10.9	18.3	20.9	28.1	8.86	16	10.9	19.7	23.6	39.7	11.4	9.51	14.1	25.2	35.6	11.5
IgG1	0.68	2.76	1.48	1.18	0.85	1.11	0.63	3	1.44	1.36	1.27	1.2	3.8	2.09	0.97	1.92	1.92

## Sheet: 30 weeks
Spleen
	total PCs						eGFP+ PCs						eGFP+RFP+ PCs
IgA	12.3	11.2	5.96	5.84	5.92	11	15.5	13.8	7.76	7.29	7.08	13.6	20.4	16.5	8.98	8.83	5.96
IgM	43.5	52.7	68.3	57	72	43.2	48.1	56.9	68.6	63.1	76.3	50.7	55.5	63.6	77.5	74.2	84.6
IgG1	9.51	11.6	13.1	11.1	7.4	16.3	11.2	13.1	15.4	12.2	7.3	20.8	7.34	9.08	9.5	7.68	4.6
Bone marrow
	total PCs						eGFP+ PCs						eGFP+RFP+ PCs
IgA	35.9	26.1	14.3	11.2	4.21	35.7	50	42.5	21.8	17.2	6.68	56.7	54.3	47.7	23.6	17.7	7.1
IgM	28.1	37.9	68	64.6	82.6	18.9	30.9	46.7	74.2	76.8	89.8	22.9	29.7	46.4	74.7	78.6	90.6
IgG1	1.56	1.81	0.27	1.03	0.59	2.45	1.49	2.04	0.22	1.51	0.85	3.6	1.59	1.25	0.19	1.17	0.66
mLN
	total PCs						eGFP+ PCs						eGFP+RFP+ PCs
IgA	39.6	42.8	46.6	32.2	45.5	24.6	52.5	59.7	63.6	43.4	55.5	25.1	53.5	56.8	67.5	43.5	49.1
IgM	8.77	18	15	14.4	11.2	18.4	11.7	25.3	18.5	16.7	12.1	21	16.7	30.4	21.2	19.2	18
IgG1	4.82	0.7	1.36	11.3	13.5	30	5.41	0.81	1.43	13.5	13.5	32	3.88	0.92	1.44	12.3	12.1
Peyer's patch
	total PCs						eGFP+ PCs						eGFP+RFP+ PCs
IgA	40.3	19.8	34.3	29	14.3	57.3	50.7	28.9	38.6	31.3	15.4	65	49.5	28.1	36.3	29.2	14.8
IgM	16.9	29.8	28	29.7	18.2	13.2	19.9	40.5	34.8	31.5	19.5	14	24.1	47.3	40.3	35.6	18.6
IgG1	1.34	1.2	1.44	2.12	4.56	0.98	1.86	1.38	1.8	2.16	4.58	1.16	1.93	1.34	1.51	2.42	4.48
