# Supplementary material for: Genetic timestamping of plasma cells in vivo reveals tissue-specific homeostatic population turnover
Source: eLife. 2020 Nov 2;9:e59850. doi: 10.7554/eLife.59850 (PMC7682985; doi:10.7554/eLife.59850)
Supplement: Figure 6—source data 1. [file elife-59850-fig6-data1.xlsx]

## Sheet: Bone marrow # Plasma cells
	Total PC										GFP+										GFP+RFP+										GFP+RFPneg
5D	53964	142523	166953	101493	70720	192634					29950	90644.9	134731	76119.8	58626.9	167206					25578.9	77390.2	129722	67898.8	52545	154107					4543.77	13297.4	4958.5	8180.34	6053.63	13118.4
2M	91098	73260	116928	158620	179335						61764.4	54212.4	87579.1	124517	133067						32248.7	32747.2	53202.2	77882.4	57028.5						29515.8	21465.2	34376.8	46634.3	76038
5M	288534	206126	162400	176121	97845	110314	76008	170940	159040		211207	136455	117902	142306	63012.2	68615.3	42716.5	107008	85563.5		17312	28033.1	15752.8	50722.8	14089.7	30226	19078	28034.2	27354.9		193895	108628	102150	91582.9	48922.5	38389.3	23562.5	78974.3	58049.6

## Sheet: Spleen # Plasma cells
	Total PC										GFP+										GFP+RFP+										GFP+RFPneg
5D	222355	485258	332358	179986	234069	351912					176995	352298	291810	155328	198725	299477					120961	247967	274195	140029	175084	255488					55811.2	104331	17681.4	15172.8	23641	43989
2M	288099	219604	481322	265323	510030						199076	177440	387464	202972	403434						55603.1	84986.7	137177	52534	136688						143473	92453.3	250287	150438	309545.408*	266746
5M	309148	274645	256977	414125	228382	633068	205599	678216	1074331		213621	177146	188107	273322	135431	376675	131995	387940	510307		19816.4	25569.4	20635.3	22072.9	11396.3	44631.3	14885.4	28485.1	38675.9		193836	151604	167549	250960	124240	332361	117191	358776	471631
